# Supplementary material for: Longitudinal Study of Viral and Bacterial Contamination of Hospital Pediatricians’ Mobile Phones
Source: MDPI journal article supplement (doi:10.3390/microorganisms8122011), 2020-12-16
Supplement: s1 [file s1]

## Supplementary Materials

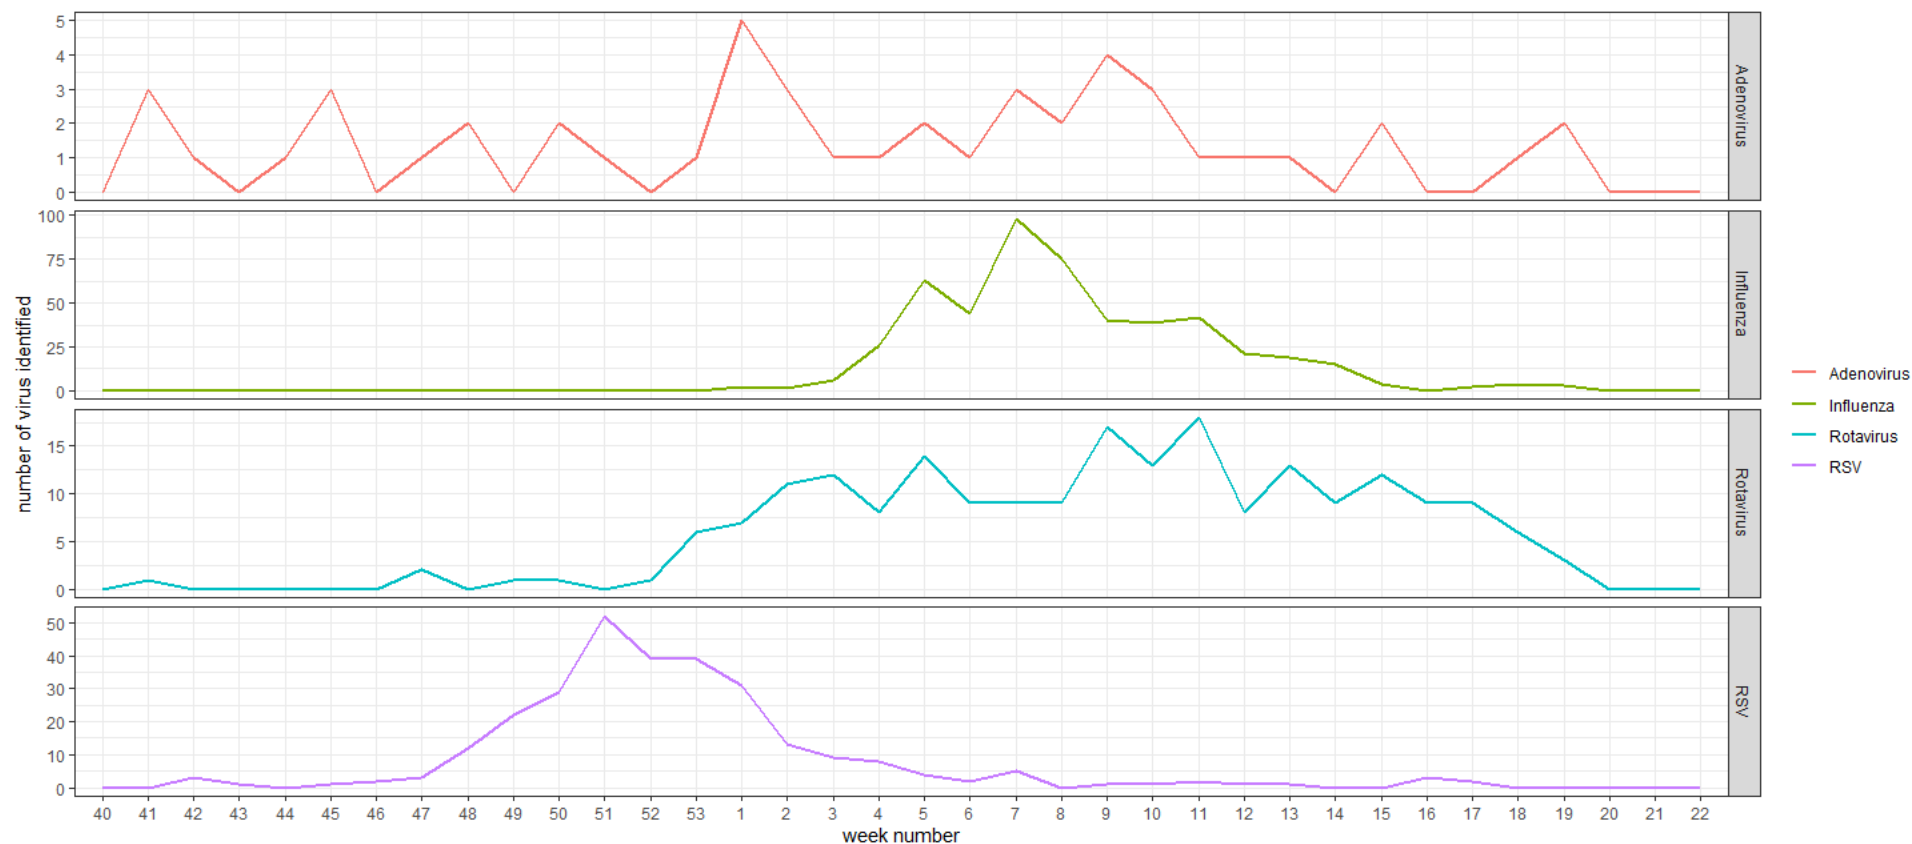

**Figure S1.** Epidemiological data in our centre during the study period.

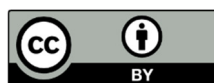

© 2020 by the author. Licensee MDPI, Basel, Switzerland. This article is an open access article distributed under the terms and conditions of the Creative Commons Attribution (CC BY) license (<http://creativecommons.org/licenses/by/4.0/>).
